# Supplementary material for: Revisiting density-dependent fecundity in schistosomes using sibship reconstruction
Source: PLoS Negl Trop Dis. 2021 May 13;15(5):e0009396. doi: 10.1371/journal.pntd.0009396 (PMC8148369; doi:10.1371/journal.pntd.0009396)
Supplement: S1 Data — (CSV) [file pntd.0009396.s002.csv]

	ID	school	year	eggs	m	n	sex
1	10B1002	1	3	432	9	6	1
2	10B1026	1	3	400	6	5	2
3	10B1032	1	3	176	18	13	2
4	10B1033	1	3	740	14	10	2
5	10B2005	1	3	340	10	8	2
6	10B2017	1	3	192	13	11	2
7	10B2024	1	3	336	13	11	1
8	10B3007	1	3	424	10	8	2
9	10B4001	1	3	72	14	10	2
10	10K0001	2	3	608	17	11	2
11	10K0002	2	3	1300	9	7	2
12	10K0007	2	3	774	12	9	2
13	10K0010	2	3	332	14	11	1
14	10K0011	2	3	444	16	11	1
15	10K0012	2	3	1216	13	10	1
16	10K0015	2	3	740	9	8	2
17	10K0016	2	3	1536	12	8	2
18	10K0017	2	3	2520	17	11	1
19	10K1002	2	3	330	6	4	2
20	10K1010	2	3	768	14	10	2
21	10K1016	2	3	124	17	14	2
22	10K1035	2	3	1272	15	11	1
23	10K1036	2	3	344	11	9	1
24	10K2006	2	3	516	10	8	1
25	10K2012	2	3	296	16	14	2
26	10K2027	2	3	600	18	16	2
27	10K2061	2	3	608	18	14	2
28	5B11	1	1	6	13	12	1
29	5B12	1	1	168	16	15	2
30	5B13	1	1	6	15	14	2
31	5B17	1	1	180	1	1	2
32	5B2	1	1	252	16	16	1
33	5B23	1	1	0	15	13	1
34	5B26	1	1	0	14	13	1
35	5B27	1	1	0	17	16	2
36	5B29	1	1	0	14	13	2
37	5B3	1	1	78	17	16	2
38	5B31	1	1	0	1	1	1
39	5B32	1	1	204	18	15	2
40	5B37	1	1	120	18	16	2
41	5B40	1	1	0	19	15	1
42	5B44	1	1	0	1	1	1
43	5B45	1	1	114	19	17	1
44	5B47	1	1	42	17	16	1
45	5B48	1	1	144	13	12	2
46	5B58	1	1	0	18	18	1
47	5B62	1	1	18	4	4	1
48	5B64	1	1	474	15	15	1
49	5B65	1	1	180	17	15	2
50	5B66	1	1	144	17	16	1
51	5B67	1	1	126	15	14	1
52	5B68	1	1	144	16	15	2
53	5B7	1	1	78	18	15	1
54	5B72	1	1	138	20	17	1
55	5B74	1	1	18	18	16	2
56	5B75	1	1	0	1	1	1
57	5B76	1	1	0	2	2	1
58	5B79	1	1	648	14	13	1
59	5B80	1	1	60	18	16	1
60	5B85	1	1	108	14	14	2
61	5B86	1	1	0	17	15	1
62	5B87	1	1	0	19	18	2
63	5B90	1	1	42	18	18	1
64	5B92	1	1	0	16	16	1
65	5K1	2	1	0	16	16	2
66	5K10	2	1	366	11	11	1
67	5K102	2	1	60	9	9	2
68	5K103	2	1	162	15	13	1
69	5K104	2	1	480	15	15	2
70	5K105	2	1	486	2	2	2
71	5K108	2	1	0	7	6	1
72	5K11	2	1	0	18	17	2
73	5K111	2	1	162	8	8	1
74	5K114	2	1	6	15	12	2
75	5K119	2	1	0	14	12	1
76	5K120	2	1	630	13	12	2
77	5K121	2	1	672	10	10	1
78	5K122	2	1	498	15	14	2
79	5K124	2	1	12	14	14	2
80	5K126	2	1	960	11	11	2
81	5K129	2	1	2712	15	14	1
82	5K130	2	1	0	13	13	2
83	5K16	2	1	420	2	2	1
84	5K19	2	1	30	13	13	1
85	5K2	2	1	2148	17	17	1
86	5K20	2	1	612	8	8	2
87	5K22	2	1	6	16	15	2
88	5K24	2	1	0	13	8	2
89	5K3	2	1	3756	14	14	2
90	5K30	2	1	450	10	9	2
91	5K36	2	1	252	14	14	1
92	5K4	2	1	126	17	17	1
93	5K41	2	1	384	11	10	1
94	5K42	2	1	708	3	3	2
95	5K43	2	1	78	11	9	1
96	5K46	2	1	66	11	11	2
97	5K51	2	1	108	17	15	1
98	5K53	2	1	6	13	12	2
99	5K55	2	1	852	14	13	2
100	5K58	2	1	6	16	15	2
101	5K59	2	1	1146	15	15	1
102	5K76	2	1	1428	11	11	2
103	5K79	2	1	312	15	15	1
104	5K8	2	1	6	12	11	1
106	6B1053	1	2	30	7	5	1
107	6B1056	1	2	30	14	12	1
108	6B1061	1	2	42	14	12	2
109	6B1077	1	2	6	17	13	2
110	6B1090	1	2	6	16	12	1
112	6B1129	1	2	132	3	3	1
113	6B1134	1	2	162	16	12	1
114	6B1138	1	2	192	15	9	1
115	6B1140	1	2	54	16	11	1
117	6B1146	1	2	24	14	8	1
119	6B1149	1	2	0	19	16	2
120	6B1154	1	2	30	18	15	2
121	6B1157	1	2	12	19	13	1
123	6K10	2	2	84	20	16	2
124	6K1011	2	2	108	20	16	2
125	6K1019	2	2	774	18	17	1
126	6K1027	2	2	372	15	13	2
127	6K1043	2	2	4740	19	18	1
128	6K1046	2	2	426	19	17	2
129	6K1053	2	2	168	16	16	2
130	6K1061	2	2	0	6	6	2
131	6K1064	2	2	1224	18	18	1
132	6K1069	2	2	408	13	12	2
133	6K1104	2	2	378	16	16	2
134	6K1111	2	2	1230	19	18	1
135	6K1117	2	2	1002	14	14	2
136	6K1120	2	2	294	16	14	2
137	6K1139	2	2	564	14	11	1
138	6K1140	2	2	1044	3	3	1
139	6K1142	2	2	1002	16	13	1
140	6K1156	2	2	792	19	15	2
141	6K1167	2	2	138	13	13	2
142	6K1178	2	2	576	17	17	1
143	6K1192	2	2	540	16	12	1
145	6K1228	2	2	150	13	11	2
146	6K16	2	2	348	15	15	2
147	6K28	2	2	942	11	10	1
148	6K30	2	2	60	3	3	1
149	6K4	2	2	1182	18	16	2
150	6K7	2	2	60	19	18	2
151	6K9	2	2	948	20	19	2
